# Supplementary material
Source: MDPI journal article supplement (https://www.mdpi.com/2073-4441/14/11/1750)
Supplement: s1 [file s1]

Table S1 Physicochemical parameters measured in the Palazzo Borghese pond in each sampling occasion over the years 2019-2021.

| Year | Sampling date | O <sub>2</sub><br>(mg/l) | Conductivity<br>( $\mu\text{S cm}^{-1}$ ) | pH<br>(units) | Air<br>temperature<br>(°C) | Water<br>temperature<br>(°C) | Chlorides<br>(mg/l) | Sulphates<br>(mg/l) | NH <sub>4</sub> <sup>+</sup><br>(mg/l) | NO <sub>3</sub> -N<br>(mg/l) | NO <sub>2</sub> -N<br>(mg/l) | P-PO <sub>4</sub><br>(mg/l) | BOD <sub>5</sub><br>(mg/l) | COD<br>(mg/l) |
|------|---------------|--------------------------|-------------------------------------------|---------------|----------------------------|------------------------------|---------------------|---------------------|----------------------------------------|------------------------------|------------------------------|-----------------------------|----------------------------|---------------|
| 2019 | 27/04/2019    | 7.20                     | 211                                       | 7.41          | 7.5                        | 4.90                         | 15                  | 0                   | 0.063                                  | 1.1                          | 0.07                         | 0.09                        | 0.0                        | 10.30         |
| 2019 | 17/05/2019    | 8.10                     | 193                                       | 7.76          | 6.5                        | 7.80                         | 4                   | 0                   | 0.098                                  | 0.3                          | 0.06                         | 0.07                        | 0.5                        | 32.4          |
| 2019 | 31/05/2019    | 9.80                     | 197                                       | 8.60          | 5.0                        | 7.80                         | 14                  | 0                   | 0.060                                  | 0.3                          | 0.07                         | 0.09                        | 1.8                        | 8.0           |
| 2019 | 09/06/2019    | 8.00                     | 203                                       | 8.28          | 22.5                       | 19.80                        | 23                  | 0                   | 0.063                                  | 0.6                          | 0.05                         | 0.22                        | 0.8                        | 13.3          |
| 2020 | 04/05/2020    | 8.80                     | 180                                       | 7.75          | 12.5                       | 8.80                         | 11                  | 0                   | 0.165                                  | 0.3                          | 0.07                         | 0.04                        | 1.8                        | 8.0           |
| 2020 | 14/05/2020    | 7.02                     | 238                                       | 7.42          | 16.2                       | 18.00                        | 12                  | 5                   | 0.119                                  | 0.7                          | 0.09                         | 0.21                        | 1.7                        | 10.7          |
| 2021 | 14/05/2021    | 11.40                    | 147                                       | 8.24          | 10.0                       | 5.46                         | 34                  | 0                   | 0.033                                  | 0.8                          | 0.09                         | 0.03                        | 0.4                        | 10.7          |
| 2021 | 24/05/2021    | 9.73                     | 160                                       | 8.30          | 14.3                       | 12.70                        | 14                  | 0                   | 0.034                                  | 0.4                          | 0.06                         | 0.05                        | 0.9                        | 15.1          |
| 2021 | 31/05/2021    | 8.95                     | 161                                       | 7.89          | 9.3                        | 14.99                        | 30                  | 0                   | 0.046                                  | 0.4                          | 0.07                         | 0.04                        | 1.9                        | 12.3          |
| 2021 | 11/06/2021    | 6.76                     | 105                                       | 7.48          | 18.5                       | 21.39                        | 27                  | 0                   | 0.065                                  | 0.4                          | 0.08                         | 0.12                        | 3.0                        | 23.1          |
