# Supplementary material
Source: MDPI journal article supplement (https://www.mdpi.com/2073-4441/14/11/1750)
Supplement: s1 [file s1]

Table S2 Mean densities (ind L<sup>-1</sup>) of each zooplankton taxon collected in the Palazzo Borghese pond, during each sampling occasion, over the years 2019-2021.

|                                             |                                                           | 27 April<br>2019 | 17 May<br>2019 | 31 May<br>2019 | 9 June<br>2019 | 4 May<br>2020 | 14 May<br>2020 | 14 May<br>2021 | 24 May<br>2021 | 31 May<br>2021 | 11 June<br>2021 |
|---------------------------------------------|-----------------------------------------------------------|------------------|----------------|----------------|----------------|---------------|----------------|----------------|----------------|----------------|-----------------|
| ANOSTRACA<br><i>C. sibyllae</i> life stages | Non-reproductive females                                  |                  |                | 0.0056         | 0.0009         |               |                |                |                |                | 0.0004          |
|                                             | Ovigerous females                                         |                  |                | 0.0004         | 0.0073         |               |                |                |                |                | 0.0073          |
|                                             | Empty ovisac females                                      |                  |                | 0.0048         | 0.0060         |               |                |                |                |                | 0.0052          |
|                                             | Juveniles                                                 |                  |                | 0.0009         | 0.0004         |               |                |                |                |                | 0.0013          |
|                                             | Metanauplii                                               | 0.0052           | 0.0030         | 0.0030         |                | 0.0004        | 0.0004         |                |                |                |                 |
|                                             | Males                                                     |                  |                | 0.0082         | 0.0137         |               |                |                |                |                | 0.0154          |
| CLADOCERA                                   | <i>Chidorus sphaericus</i>                                |                  |                |                |                | 0.0001        |                | 0.0013         | 0.0003         |                |                 |
| COPEPODA                                    | <i>Diacyclops bisetosus</i>                               | 0.0013           | 0.0354         | 0.3081         | 0.0026         | 0.0004        | 0.0107         | 0.0004         | 0.0009         | 0.0022         | 0.0090          |
| OSTRACODA                                   | <i>Herpetocypris reptans</i><br>and <i>Cyclocypris</i> sp |                  | 0.0056         | 0.0013         | 0.0004         |               | 0.0004         |                |                |                | 0.0004          |
